# Supplementary material
Source: Springer Nature journal article supplement (https://www.springermedizin.de/resource/supplementary/12967_2009_375_MOESM2_ESM.pdf/9576334)

### Belatacept

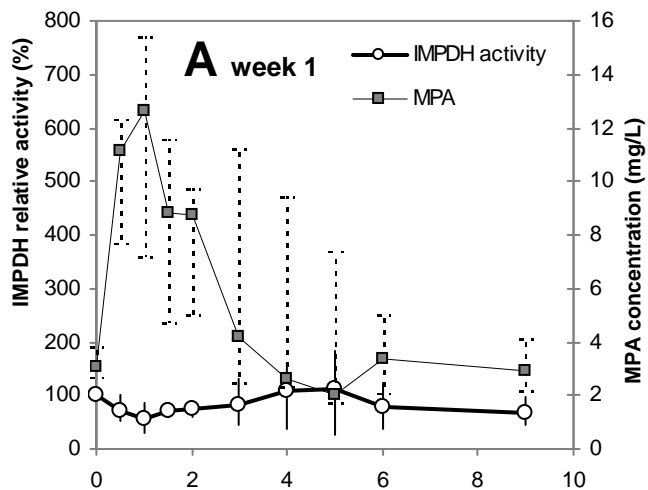

### Cyclosporine

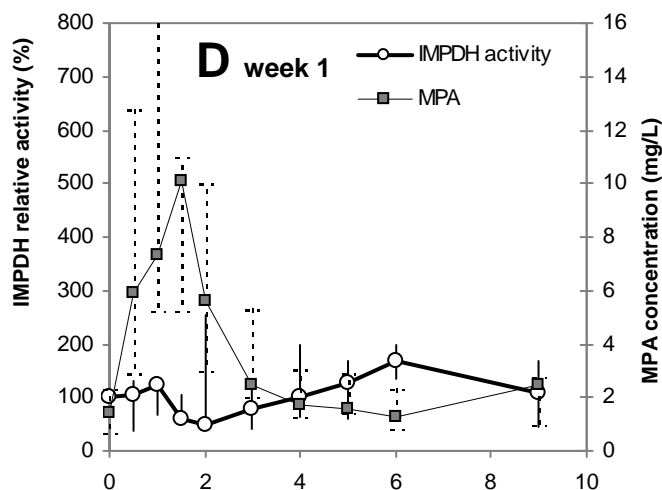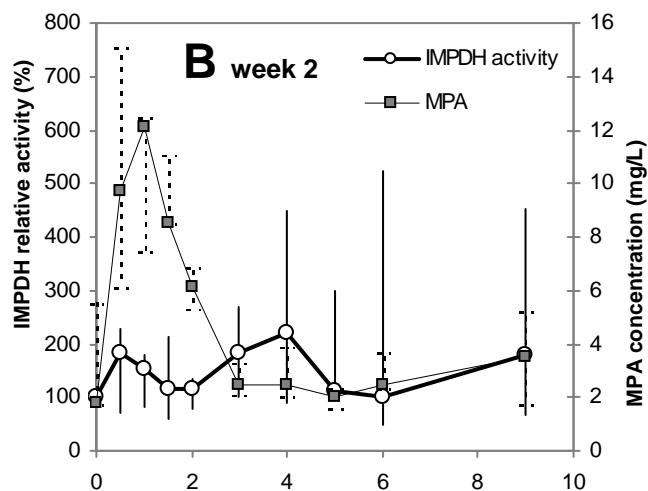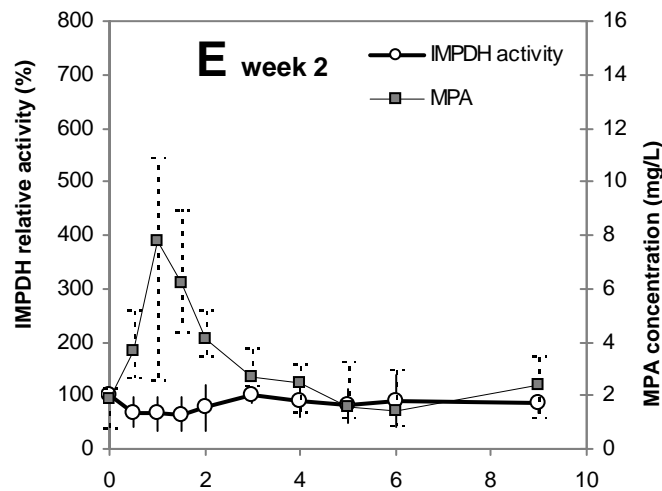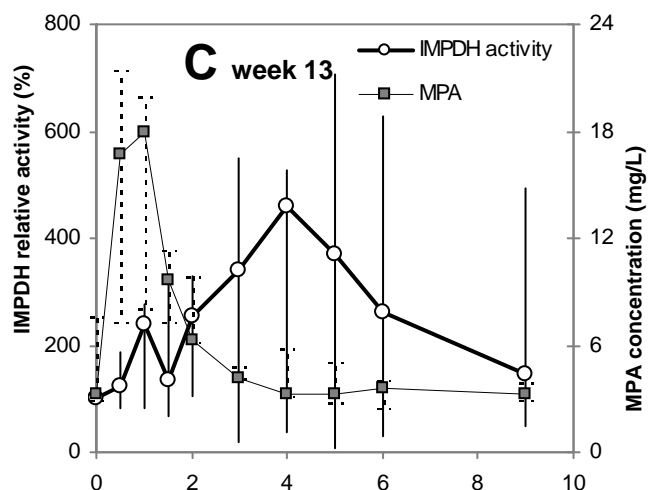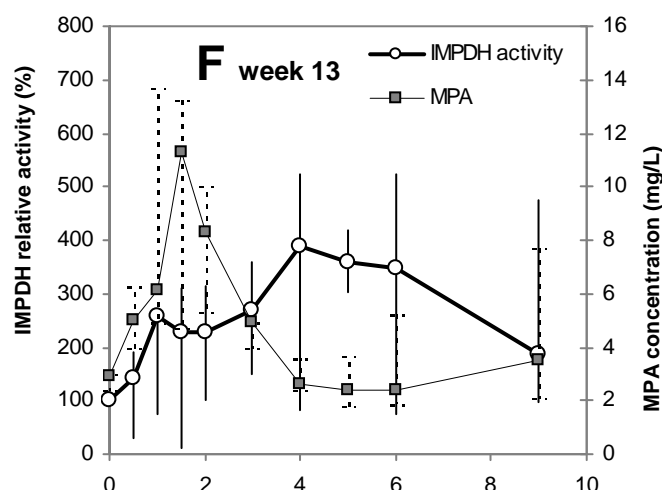

Hours post-dose

Supplement: MOESM2 [file 9576334]
